## 36 Abstract

37 During aerobic exercise, central hemodynamics and CO<sub>2</sub> partial pressure are central to middle  
38 cerebral artery blood velocity (MCAv) response. Still, the extent of their contribution is unknown.  
39 The purpose of this study was to characterize and utilize statistical modeling to determine the  
40 contribution of heart rate (HR), mean arterial pressure (MAP), and end-tidal CO<sub>2</sub> (P<sub>ET</sub>CO<sub>2</sub>)  
41 dynamics to MCAv dynamics. Three randomized exercise bouts were completed on a  
42 recumbent stepper at 30-40% (Low), 45-55% (Mod1), and 60-70% (Mod2) of estimated HR<sub>max</sub>.  
43 A 90-s resting period was followed by 6-min of continuous exercise within the estimated HR  
44 ranges. HR, MAP, P<sub>ET</sub>CO<sub>2</sub>, and MCAv exercise dynamics were modeled with a  
45 monoexponential curve. From this modeling, the baseline (BL), time delay (T<sub>D</sub>), time constant (τ),  
46 and steady-state (SS) responses were determined. Backward AIC linear regression models  
47 determined contributing dynamics. Seventeen healthy adults completed all exercise bouts (28 ±  
48 6 yrs, 8 females). The time from initiation of exercise to an exponential increase in HR (HR<sub>TD</sub>)  
49 was significantly longer for Low than Mod2 (p=0.047). The time constant for the rise in HR (HR<sub>T</sub>)  
50 was significantly shorter for Low than Mod1 and Mod2 (p=0.01). The absolute change in HR  
51 from baseline to steady-state (HR<sub>SS</sub>) was significantly lower for Low than Mod1 and Mod2  
52 (p<0.001), and Mod1 was significantly lower than Mod2 (p<0.001). MAP<sub>SS</sub> was significantly  
53 lower for Low than Mod1 (p=0.01) and Mod2 (p<0.001). Exercise intensity, HR<sub>TD</sub>, and MAP<sub>TD</sub>  
54 accounted for 17% of variation for MCAv<sub>TD</sub> (p=0.01). HR<sub>TD</sub>, P<sub>ET</sub>CO<sub>2TD</sub>, and MCAv<sub>TD</sub> accounted  
55 for 21% of variation MCAv<sub>T</sub> (p<0.01). MCAv<sub>T</sub>, MAP<sub>SS</sub>, and P<sub>ET</sub>CO<sub>2SS</sub> accounted for 60% of  
56 variation for MCAv<sub>SS</sub> (p<0.001). Throughout the MCAv dynamic response pathway central  
57 hemodynamics and end-tidal CO<sub>2</sub> do not account for most MCAv response until the steady-state  
58 phase. Thus, other physiological factors should be considered with assessing cerebrovascular  
59 function during aerobic exercise.

60

## 61 Introduction

62 It has been established that aerobic exercise is good for brain health through  
63 adaptations of the vascular system [1, 2]. The recent application of a dynamic cerebrovascular  
64 modeling technique can determine the response pathway during aerobic exercise [3] and may  
65 be valuable for understanding the underlying mechanisms contributing to cerebrovascular  
66 health. This modeling technique is attainable because of utilizing beat-by-beat and breath-by-  
67 breath physiological measures during exercise [4]. In addition to middle cerebral blood velocity  
68 (MCAv), the dynamic modeling can be applied to heart rate, mean arterial pressure, and end-  
69 tidal CO<sub>2</sub> partial pressure.

70 Previous investigations have established the MCAv dynamic response during aerobic  
71 exercise in healthy adults across the aging spectrum [5-7] and in clinical populations, such as  
72 stroke [8, 9]. This technique has revealed that MCAv increases exponentially following the onset  
73 of exercise and is a method for identifying unique age- and disease-specific profiles. Evidence  
74 suggests MCAv increases from rest during low to moderate-intensity exercise, with the  
75 amplitude greatest during moderate-intensity exercise [5]. Additionally, MCAv amplitude is  
76 negatively associated with age and positively correlated with estimated VO<sub>2</sub>max [5]. Within older  
77 adults, the time delay is significantly longer (i.e., slower) than in young adults [6], and elevated  
78 cerebral resistance in older adults attenuates the MCAv response compared to older adults with  
79 normal cerebral resistance [7]. Lastly, compared to healthy older adults, individuals post-stroke  
80 have a significantly lower MCAv amplitude in both hemispheres [8].

81 Central hemodynamics and end-tidal CO<sub>2</sub> partial pressure are central to the middle  
82 cerebral artery blood velocity (MCAv) dynamic response during acute aerobic exercise.  
83 However, there is still a lack of understanding of the central hemodynamic and end-tidal CO<sub>2</sub>  
84 partial pressure dynamics and how their responses contribute to MCAv dynamics during aerobic  
85 exercise.

86 This investigation aimed to characterize and assess the contribution of exercise  
87 intensity, central hemodynamics (i.e., heart rate and mean arterial pressure), and end-tidal CO<sub>2</sub>  
88 partial pressure dynamics to MCAv dynamics during acute bouts of aerobic exercise in young,  
89 healthy adults. We hypothesize that heart rate will significantly contribute to the initiation of  
90 exercise, but that mean arterial pressure and end-tidal CO<sub>2</sub> will be significant contributors during  
91 the steady-state phase. Additionally, we explored exercise dynamics within males and females.

92

## 93 **Materials and methods**

### 94 **Study design**

95 The experimental protocol consisted of three separate, 6-min bouts of exercise. The  
96 order of the exercise bouts was randomized using a random number generator. All data were  
97 collected during a single visit to the laboratory. Data were collected between October 2016 and  
98 September 2021, and data were assessed for this investigation in March 2022.

99

### 100 **Participant criteria**

101 Participants were screened using our established inclusion/exclusion criteria [3].  
102 Inclusion criteria were: 1) the ability to perform repeated bouts of exercise and 2) the ability to  
103 travel to the University of Kansas Medical Center for testing. Exclusion criteria were: 1) inability  
104 to acquire a middle cerebral artery transcranial Doppler ultrasound (TCD) signal, 2) inability to  
105 perform the alternating leg movements on the seated recumbent stepper, 3) diagnosis of any  
106 neurological conditions such as multiple sclerosis, 4) pulmonary disease, or 5) diagnosis of  
107 myocardial infarction or heart failure.

108 Participants were asked to abstain from food for two hours [10], caffeine for a minimum  
109 of 6 hours [11], and vigorous exercise for 12 hours [6] before testing. Female participants were

110 verbally questioned regarding menstrual status. We did not directly assess hormone levels, but  
111 females exercised during their menstrual cycle's early follicular phase (Days 1-7) [6].

112 The research was conducted following the principles embodied in the Declaration of  
113 Helsinki and following local statutory requirements. The University of Kansas Medical Center  
114 Human Subjects Committee approved all experimental procedures (IRB number  
115 STUDY00003176). Institutionally approved written informed consent was obtained before  
116 participation.

117

## 118 **Recumbent stepper familiarization**

119 The Karvonen method was used to determine the appropriate heart rate range for each  
120 exercise intensity (HR range = [% exercise intensity (age-predicted HRmax - HRrest)] + HRrest)  
121 [3, 12]. Participants were familiarized with the prescribed rate of 120 steps per minute. The  
122 target work rate was determined by setting the initial resistance to 40 watts and then increasing  
123 10 watts every 30 seconds. Once the target heart rate was achieved for the first intensity and  
124 maintained for one minute, watts were increased progressively until the target heart rate for the  
125 second intensity was achieved and maintained, and then again until the target heart rate for the  
126 third intensity was achieved.

127

## 128 **Instrumentation**

129 After familiarization, participants were instrumented with (1) a standard 5-lead ECG  
130 (Cardiocard, Nasiff Associates, Central Square, NY, USA) with lead II continuously recorded, (2)  
131 a finger hemodynamic monitoring system (Finometer, Finapres Medical System, Netherlands),  
132 used to measure beat-by-beat arterial pressure, (3) a brachial oscillometric blood pressure cuff  
133 (Tango M2 Stress Test Monitor, SunTech Medical, Inc., Morrisville, NC, USA) placed on the  
134 contralateral arm to the Finapres and used for comparison to ensure accuracy, and (4) expired

135 CO<sub>2</sub> was continuously measured by a nasal cannula connected to a CO<sub>2</sub> capnograph (BCI  
136 Capnocheck Sleep 9004 Smiths Medical, Dublin, OH, USA) [3].

137 Transcranial Doppler ultrasound (TCD, 2 MHz probes; Multigon Industries Inc., Yonkers,  
138 NY, USA) measured MCAv with probes on the right and left trans-temporal windows. A Mueller-  
139 Moll probe fixation device held the ultrasound probes in place. The TCD signal was optimized  
140 by adjusting the probe angle and depth settings [3].

141

## 142 **Exercise bouts**

143 The exercise consisted of three different intensities: 30-40% (Low), 45-55% (Mod1), and  
144 60-70% (Mod2) of age-predicted heart rate max (HRmax) [12]. The intensities of the three  
145 exercise bouts were kept below the ventilatory threshold (i.e., anaerobic threshold) [12]. It has  
146 been previously established that during vigorous-intensity exercise above the ventilatory  
147 threshold, CO<sub>2</sub> plays a greater role than the hemodynamic responses and decreases MCAv [13,  
148 14].

149 The baseline recording lasted 90-s, followed by 6-min of continuous exercise within the  
150 target HR range. The Borg Scale was used to measure the participants' rating of perceived  
151 effort or exertion (RPE) during the exercise bout [15]. Participants were asked to rate their  
152 perceived exertion on a scale of 6 to 20 immediately following the exercise. To ensure  
153 participants returned to a rested state, participants remained seated for a minimum of 10  
154 minutes or until heart rate, blood pressure, and end-tidal CO<sub>2</sub> partial pressure returned to resting  
155 values before the next bout started [3].

156

## 157 **Data acquisition**

158 All variables were sampled at 500 Hz and interpolated to 2.0 Hz. Data with R-to-R  
159 intervals greater than 5 Hz or changes in peak MCAv greater than 10 cm s<sup>-1</sup> in a single cardiac

160 cycle were considered an artifact and censored. Three-second averages were calculated and  
161 smoothed with a 9-second sliding window average [3].

162

## 163 **Dynamic modeling**

164 Heart rate (HR), mean arterial pressure (MAP), end-tidal CO<sub>2</sub> (P<sub>ET</sub>CO<sub>2</sub>), and MCAv  
165 dynamics were modeled with a monoexponential curve [16]. A custom-written script within R  
166 version 4.1.0 and the nls function package (R Core Team, Vienna, Austria) was used to model  
167 the exercise response [16]. R scripts and data related to this manuscript are available from the  
168 corresponding author upon reasonable request.

169 From this modeling, we were able to determine baseline (<sub>BL</sub>), time delay (<sub>TD</sub>), time  
170 constant ( $\tau$ ), and steady-state (<sub>SS</sub>) responses (Table 1). <sub>BL</sub> is the average of 90-s before the  
171 onset of exercise. <sub>TD</sub> is the time delay preceding the exponential increase in the variable of  
172 interest.  $\tau$  is the time constant or time-to-63% of the peak. <sub>SS</sub> is the absolute change from <sub>BL</sub> to  
173 the 90-s average of steady-state exercise (3 to 4.5 minutes) [3].

174

175 **Table 1.** Metrics of the dynamic modeling

| <b>Metric</b>       | <b>Abbreviation</b> | <b>Definition</b>                                       |
|---------------------|---------------------|---------------------------------------------------------|
| <b>Baseline</b>     | BL                  | Resting 90-s average before the onset of exercise       |
| <b>Time Delay</b>   | TD                  | Delay preceding the exponential increase                |
| <b>Tau</b>          | $\tau$              | Time-to-63% of the peak                                 |
| <b>Steady-State</b> | SS                  | Absolute change from BL to the average of minutes 3-4.5 |

176

## 177 **Statistical Analysis**

178 Parametric (one-way ANOVA) or non-parametric (Kruskal-Wallis) tests were completed  
179 to compare variables following a visual inspection of Q-Q plots and the Shapiro-Wilk test. For

180 post-hoc comparisons, Bonferroni correction was used for parametric comparisons, and the  
181 Dunn test was used for non-parametric comparisons.

182 For evaluation of the contribution of central hemodynamics and  $P_{ET}CO_2$  to MCAv  
183 dynamics, a backward stepwise Akaike Information Criterion (AIC) linear regression model  
184 selection was completed. The models included exercise intensity, the preceding dynamic  
185 factors, and the equivalent dynamic factors. For example, the model for  $MCAv_{TD}$  had exercise  
186 intensity,  $HR_{BL}$ ,  $MAP_{BL}$ ,  $P_{ET}CO_{2BL}$ , and  $MCAv_{BL}$ , along with  $HR_{TD}$ ,  $MAP_{TD}$ , and  $P_{ET}CO_{2TD}$ . The  
187 same modeling technique was used within sex as well.

188 Data analyses were performed with R version 4.1.0 (R Core Team, Vienna, Austria).  
189 Data are presented as mean  $\pm$  standard deviation unless otherwise noted, and statistical  
190 significance was evaluated at  $\alpha < 0.05$ .

191

## 192 **Results**

### 193 **Participant and exercise characteristics**

194 Seventeen adults completed all three bouts of exercise ( $28 \pm 6$  years of age, 8 females,  
195  $174 \pm 10$  cm,  $69 \pm 12$  kg, and body mass index  $22.7 \pm 3$  kg m<sup>-2</sup>).

196 Acquired heart rates during the steady-state phase were all within the estimated HR  
197 range (Table 2). Post-hoc comparisons between exercise bouts for  $HR_{SS}$  were all significantly  
198 different within the total sample (all comparisons  $p < 0.001$ ). Within males, Low  $HR_{SS}$  was  
199 significantly lower than Mod2 ( $p < 0.001$ ), and Mod1 was significantly lower than Mod2 ( $p = 0.01$ ).  
200 There was not a significant difference between Low and Mod1 ( $p = 0.06$ ). Within females,  
201 comparisons between exercise bouts for  $HR_{SS}$  were all different, with HR significantly increasing  
202 between exercise bouts (Low vs. Mod1,  $p < 0.001$ ; Low vs. Mod2,  $p < 0.001$ ; Mod1 vs. Mod2,  
203  $p < 0.01$ ).



204 Watts for Low was significantly lower than Mod2 ( $p < 0.001$ ) for the total sample, but  
 205 Mod1 was not significantly different than Low ( $p = 0.19$ ) or Mod2 ( $p = 0.25$ ). Within males, Low  
 206 was significantly lower than Mod2 ( $p = 0.02$ ), but Mod1 was not significantly different than Low  
 207 ( $p = 0.51$ ) or Mod2 ( $p = 0.35$ ). Similarly, within females, Low was significantly lower than Mod2  
 208 ( $p < 0.001$ ), but Mod1 was not significantly different than Low ( $p = 0.18$ ) or Mod2 ( $p = 0.08$ ).

209 For RPE, all comparisons were all significantly different, with RPE increasing with bout  
 210 intensity (Low vs. Mod1,  $p < 0.001$ ; Low vs. Mod2,  $p < 0.001$ ; Mod1 vs. Mod2,  $p < 0.01$ ). Within  
 211 males, RPE was significantly lower for Low than Mod1 ( $p = 0.03$ ) and Mod2 ( $p < 0.001$ ), but  
 212 participants did not perceive Mod1 to be significantly easier than Mod2 ( $p = 0.09$ ). Similarly,  
 213 within females, RPE was significantly lower for Low than Mod1 ( $p = 0.03$ ) and Mod2 ( $p < 0.001$ ),  
 214 but participants did not perceive Mod1 to be significantly easier than Mod2 ( $p = 0.16$ ).

215

216 **Table 2.** *Exercise characteristics*

|                              | Estimated HR Range (bpm) |   | HR <sub>ss</sub> | Watts (kg m <sup>2</sup> s <sup>-3</sup> ) | RPE        |           |
|------------------------------|--------------------------|---|------------------|--------------------------------------------|------------|-----------|
| <b>Total Sample (n = 17)</b> |                          |   |                  |                                            |            |           |
| <b>Low</b>                   | 111 ± 7                  | - | 118 ± 7          | 114 ± 8 *†                                 | 96 ± 32 †  | 12 ± 1 *† |
| <b>Mod1</b>                  | 124 ± 6                  | - | 136 ± 6          | 130 ± 9 ‡                                  | 119 ± 32   | 14 ± 1 ‡  |
| <b>Mod2</b>                  | 142 ± 6                  | - | 155 ± 5          | 145 ± 10                                   | 142 ± 43   | 15 ± 2    |
| <b>Males (n = 9)</b>         |                          |   |                  |                                            |            |           |
| <b>Low</b>                   | 111 ± 7                  | - | 117 ± 7          | 116 ± 10 †                                 | 116 ± 26 † | 12 ± 1 *† |
| <b>Mod1</b>                  | 123 ± 6                  | - | 136 ± 5          | 129 ± 12 ‡                                 | 139 ± 31   | 14 ± 1    |
| <b>Mod2</b>                  | 142 ± 5                  | - | 155 ± 4          | 144 ± 11                                   | 167 ± 47   | 15 ± 2    |
| <b>Females (n = 8)</b>       |                          |   |                  |                                            |            |           |
| <b>Low</b>                   | 112 ± 7                  | - | 118 ± 7          | 113 ± 6 *†                                 | 75 ± 25 †  | 11 ± 2 *† |
| <b>Mod1</b>                  | 124 ± 7                  | - | 136 ± 7          | 132 ± 5 ‡                                  | 97 ± 10    | 14 ± 2    |
| <b>Mod2</b>                  | 142 ± 7                  | - | 155 ± 7          | 146 ± 9                                    | 115 ± 8    | 15 ± 1    |

217 Mean ± standard deviation. Significance was evaluated at  $\alpha < 0.05$ . The Bonferroni correction  
 218 method was used for the post-hoc multiple comparisons. \*, Low vs. Mod1 significantly different.  
 219 †, Low vs. Mod2 significantly different. ‡, Mod1 vs. Mod2 significantly different. HR, heart rate.

220 HR<sub>SS</sub>, heart rate during steady-state. RPE, rating of perceived exertion. Low = 30-40%, Mod1 =  
221 45-55%, and Mod2 = 60-70% of estimated HR<sub>max</sub>.

222

## 223 **Comparison of dynamic factors across exercise bouts**

224         Within the total sample, resting HR (HR<sub>BL</sub>) was not significantly different between  
225 exercise bouts. The time to an exponential increase in HR after the initiation of exercise (HR<sub>TD</sub>)  
226 for Low was significantly earlier than Mod2 (p=0.047), but no difference between Low and Mod1  
227 (p=0.93) or Mod1 and Mod2 (p=0.07; Table 3). The time to 63%-of-peak (HR<sub>T</sub>) for Low was  
228 significantly slower than Mod1 and Mod2 (p=0.01, p=0.01), but there was no difference in time  
229 between Mod1 and Mod2 (p=0.82). The absolute change in response from baseline to steady-  
230 state (HR<sub>SS</sub>) for Low was significantly less than Mod1 and Mod2, and Mod1 was significantly  
231 lower than Mod2 (all post-hoc comparisons, p<0.0001). MAP<sub>SS</sub> for Low was significantly less  
232 than Mod1 (p=0.01) and Mod2 (p<0.0001), but no difference in absolute change between Mod1  
233 and Mod2 (p=0.06). For P<sub>ET</sub>CO<sub>2</sub> and MCA<sub>v</sub>, dynamic factors were not significantly different  
234 across exercise intensities.

235

236

237

238

239

240

241

242

243

244

245 **Table 3. Exercise dynamic characteristics (n = 17)**

|                                     | Low           | Mod1          | Mod2          | p-value              |
|-------------------------------------|---------------|---------------|---------------|----------------------|
| <b>Heart Rate</b>                   |               |               |               |                      |
| Baseline (bpm)                      | 74.49 ± 9.60  | 76.43 ± 8.78  | 81.50 ± 9.46  | 0.09                 |
| Time Delay (s)                      | -14.37 ± 8.59 | -14.64 ± 6.64 | -8.71 ± 5.88  | <b>0.04†</b>         |
| Tau (s)                             | 51.56 ± 28.53 | 75.34 ± 30.79 | 82.73 ± 38.27 | <b>&lt;0.01*†</b>    |
| Steady-state (Δbpm)                 | 39.69 ± 7.20  | 53.68 ± 7.51  | 63.77 ± 7.99  | <b>&lt;0.0001*†‡</b> |
| <b>Mean Arterial Pressure</b>       |               |               |               |                      |
| Baseline (mmHg)                     | 72.79 ± 13.71 | 72.38 ± 14.36 | 74.43 ± 10.56 | 0.89                 |
| Time Delay (s)                      | 25.90 ± 23.05 | 38.16 ± 14.42 | 35.62 ± 16.45 | 0.13                 |
| Tau (s)                             | 43.17 ± 30.49 | 48.00 ± 31.66 | 44.69 ± 17.63 | 0.70                 |
| Steady-state (ΔmmHg)                | 17.41 ± 6.67  | 25.82 ± 10.40 | 32.58 ± 6.64  | <b>&lt;0.0001*†</b>  |
| <b>End-tidal CO<sub>2</sub></b>     |               |               |               |                      |
| Baseline (mmHg)                     | 36.45 ± 3.92  | 35.48 ± 3.19  | 35.71 ± 3.70  | 0.72                 |
| Time Delay (s)                      | 26.93 ± 22.68 | 28.83 ± 33.45 | 27.97 ± 21.48 | 0.98                 |
| Tau (s)                             | 48.68 ± 28.08 | 38.47 ± 28.88 | 40.27 ± 35.29 | 0.44                 |
| Steady-state (ΔmmHg)                | 6.32 ± 3.13   | 7.74 ± 4.99   | 6.87 ± 4.64   | 0.64                 |
| <b>MCAv</b>                         |               |               |               |                      |
| Baseline (cm·s <sup>-1</sup> )      | 63.61 ± 11.32 | 62.72 ± 11.33 | 63.31 ± 11.25 | 0.97                 |
| Time Delay (s)                      | 37.62 ± 25.83 | 48.51 ± 19.73 | 40.06 ± 20.19 | 0.33                 |
| Tau (s)                             | 38.84 ± 31.38 | 30.51 ± 20.53 | 32.08 ± 23.16 | 0.95                 |
| Steady-state (Δcm·s <sup>-1</sup> ) | 12.69 ± 4.85  | 18.54 ± 9.42  | 18.99 ± 12.43 | 0.07                 |

246 Mean ± standard deviation. The p-value is the main effect of exercise intensity on the dependent  
 247 variables. Bold p-values indicate significance evaluated at  $\alpha < 0.05$ , and symbols represent  
 248 significance between exercise bouts. The Bonferroni correction method was used for the post-  
 249 hoc multiple comparisons. \*, Low vs. Mod1 significantly different. †, Low vs. Mod2 significantly  
 250 different. ‡, Mod1 vs. Mod2 significantly different. MCAv, middle cerebral artery blood velocity.  
 251 Tau ( $\tau$ ), time constant. Low = 30-40%, Mod1 = 45-55%, and Mod2 = 60-70% of estimated  
 252 HRmax.

253

254

255 Within males, HR<sub>BL</sub>, HR<sub>TD</sub>, and HR<sub>T</sub> were not significantly different across exercise  
 256 bouts. However, HR<sub>SS</sub> for Low was significantly lower than Mod1 and Mod2 (p<0.01 and  
 257 p<0.001), but Mod1 was not significantly lower than Mod2 (p=0.18). Additionally, MAP<sub>SS</sub> for Low  
 258 was significantly lower than Mod2 (p<0.01), but no difference in absolute change between Low  
 259 and Mod1 (p=0.08) or Mod1 and Mod2 (p=0.42). For P<sub>ET</sub>CO<sub>2</sub> and MCAv, dynamic factors were  
 260 not significantly different across exercise bouts.

261

262 **Table 4. Exercise dynamic characteristics within males (n = 9)**

|                                     | Low           | Mod1          | Mod2          | p-value            |
|-------------------------------------|---------------|---------------|---------------|--------------------|
| <b>Heart Rate</b>                   |               |               |               |                    |
| Baseline (bpm)                      | 74.18 ± 10.46 | 73.26 ± 10.12 | 81.11 ± 10.81 | 0.24               |
| Time Delay (s)                      | -12.70 ± 6.25 | -16.21 ± 5.86 | -10.62 ± 5.19 | 0.14               |
| Tau (s)                             | 52.79 ± 31.66 | 73.14 ± 22.83 | 82.28 ± 35.91 | 0.13               |
| Steady-state (Δbpm)                 | 41.41 ± 6.77  | 55.39 ± 8.60  | 63.21 ± 9.65  | <b>&lt;0.001*†</b> |
| <b>Mean Arterial Pressure</b>       |               |               |               |                    |
| Baseline (mmHg)                     | 77.78 ± 13.99 | 79.07 ± 12.77 | 78.13 ± 10.43 | 0.98               |
| Time Delay (s)                      | 23.73 ± 24.78 | 36.93 ± 15.87 | 32.63 ± 11.46 | 0.50               |
| Tau (s)                             | 47.40 ± 24.48 | 39.60 ± 23.68 | 40.59 ± 14.06 | 0.70               |
| Steady-state (ΔmmHg)                | 21.38 ± 5.96  | 30.23 ± 11.33 | 36.02 ± 5.46  | <b>&lt;0.01†</b>   |
| <b>End-tidal CO<sub>2</sub></b>     |               |               |               |                    |
| Baseline (mmHg)                     | 36.90 ± 4.08  | 34.92 ± 3.50  | 35.75 ± 4.35  | 0.58               |
| Time Delay (s)                      | 31.81 ± 19.84 | 19.29 ± 22.29 | 17.01 ± 19.80 | 0.31               |
| Tau (s)                             | 49.22 ± 30.19 | 41.79 ± 26.80 | 51.68 ± 41.73 | 0.90               |
| Steady-state (ΔmmHg)                | 7.08 ± 2.63   | 9.90 ± 5.70   | 7.94 ± 5.43   | 0.48               |
| <b>MCAv</b>                         |               |               |               |                    |
| Baseline (cm·s <sup>-1</sup> )      | 60.93 ± 8.52  | 59.59 ± 7.92  | 59.97 ± 8.85  | 0.94               |
| Time Delay (s)                      | 30.17 ± 26.17 | 43.18 ± 16.26 | 39.16 ± 17.78 | 0.40               |
| Tau (s)                             | 49.62 ± 31.30 | 29.24 ± 15.72 | 29.74 ± 10.78 | 0.45               |
| Steady-state (Δcm·s <sup>-1</sup> ) | 15.69 ± 3.61  | 23.29 ± 10.26 | 23.45 ± 14.92 | 0.11               |

263 Mean ± standard deviation. The p-value is the main effect of exercise intensity on the dependent

264 variables. Bold p-values indicate significance evaluated at α < 0.05, and symbols represent

265 significance between exercise bouts. The Bonferroni correction method was used for the post-  
266 hoc multiple comparisons. \*, Low vs. Mod1 significantly different. †, Low vs. Mod2 significantly  
267 different. ‡, Mod1 vs. Mod2 significantly different. MCAv, middle cerebral artery blood velocity.  
268 Tau ( $\tau$ ), time constant. Low = 30-40%, Mod1 = 45-55%, and Mod2 = 60-70% of estimated  
269 HRmax.

270

271 Similarly, within females, HR<sub>BL</sub>, HR<sub>TD</sub>, and HR<sub>T</sub> were not significantly different across  
272 exercise bouts. However, HR<sub>SS</sub> for Low was significantly lower than Mod1 and Mod2 ( $p < 0.01$   
273 and  $p < 0.001$ ), and Mod1 was significantly lower than Mod2 ( $p < 0.01$ ). Additionally, MAP<sub>SS</sub> for  
274 Low was significantly lower than Mod1 and Mod2 ( $p = 0.04$  and  $p < 0.001$ ), and Mod1 was  
275 significantly lower than Mod2 ( $p = 0.04$ ). For P<sub>ET</sub>CO<sub>2</sub> and MCAv, dynamic factors were not  
276 significantly different across exercise bouts.

277

278

279

280

281

282

283

284

285

286

287

288

289

290

291 **Table 5. Exercise dynamic characteristics within females**

|                                     | Low            | Mod1          | Mod2          | p-value             |
|-------------------------------------|----------------|---------------|---------------|---------------------|
| <b>Heart Rate</b>                   |                |               |               |                     |
| Baseline (bpm)                      | 74.83 ± 9.23   | 80.00 ± 5.62  | 81.93 ± 8.41  | 0.20                |
| Time Delay (s)                      | -16.25 ± 10.79 | -12.88 ± 7.40 | -6.57 ± 6.19  | 0.09                |
| Tau (s)                             | 50.18 ± 26.68  | 77.83 ± 39.46 | 83.23 ± 43.27 | 0.11                |
| Steady-state (Δbpm)                 | 37.76 ± 7.63   | 51.76 ± 6.04  | 64.39 ± 6.23  | <b>&lt;0.001*†‡</b> |
| <b>Mean Arterial Pressure</b>       |                |               |               |                     |
| Baseline (mmHg)                     | 67.18 ± 11.75  | 64.84 ± 12.74 | 70.27 ± 9.65  | 0.43                |
| Time Delay (s)                      | 28.35 ± 22.37  | 39.53 ± 13.53 | 38.99 ± 21.06 | 0.44                |
| Tau (s)                             | 38.41 ± 37.30  | 57.44 ± 38.17 | 49.30 ± 20.96 | 0.25                |
| Steady-state (ΔmmHg)                | 12.95 ± 4.24   | 20.86 ± 6.87  | 28.71 ± 5.86  | <b>&lt;0.001*†‡</b> |
| <b>End-tidal CO<sub>2</sub></b>     |                |               |               |                     |
| Baseline (mmHg)                     | 35.93 ± 3.94   | 36.11 ± 2.90  | 35.67 ± 3.12  | 0.89                |
| Time Delay (s)                      | 22.06 ± 25.59  | 39.56 ± 41.73 | 42.07 ± 14.78 | 0.38                |
| Tau (s)                             | 48.14 ± 27.90  | 34.73 ± 32.49 | 25.60 ± 18.59 | 0.28                |
| Steady-state (ΔmmHg)                | 5.55 ± 3.56    | 5.30 ± 2.67   | 5.51 ± 3.26   | 0.99                |
| <b>MCAv</b>                         |                |               |               |                     |
| Baseline (cm·s <sup>-1</sup> )      | 66.63 ± 13.79  | 66.23 ± 13.97 | 67.06 ± 13.02 | 0.93                |
| Time Delay (s)                      | 46.00 ± 24.31  | 54.50 ± 2.59  | 41.07 ± 23.84 | 0.53                |
| Tau (s)                             | 26.71 ± 28.52  | 31.94 ± 26.01 | 34.72 ± 32.83 | 0.61                |
| Steady-state (Δcm·s <sup>-1</sup> ) | 9.32 ± 3.78    | 13.20 ± 4.59  | 13.97 ± 6.69  | 0.18                |

292 Mean ± standard deviation. The p-value is the main effect of exercise intensity on the dependent  
 293 variables. Bold p-values indicate significance evaluated at  $\alpha < 0.05$ , and symbols represent  
 294 significance between exercise bouts. The Bonferroni correction method was used for the post-  
 295 hoc multiple comparisons. \*, Low vs. Mod1 significantly different. †, Low vs. Mod2 significantly  
 296 different. ‡, Mod1 vs. Mod2 significantly different. MCAv, middle cerebral artery blood velocity.  
 297 Tau ( $\tau$ ), time constant. Low = 30-40%, Mod1 = 45-55%, and Mod2 = 60-70% of estimated  
 298 HRmax.

299

300 **MCAv dynamics**

301 For  $MCAv_{TD}$ , all baseline and  $P_{ET}CO_{2TD}$  factors dropped from the model (Table 4).  
302 Exercise intensity remained in the model, but its contribution was not significant.  $HR_{TD}$  and  
303  $MAP_{TD}$  significantly contributed to  $MCAv_{TD}$ , such that the longer  $HR_{TD}$  and  $MAP_{TD}$  were to their  
304 exponential increase after initiation of exercise, the longer the exponential increase in  $MCAv_{TD}$ .  
305 Exercise intensity,  $HR_{TD}$ , and  $MAP_{TD}$  accounted for 17% of the adjusted shared variation.

306 Within males, exercise intensity and  $MAP_{BL}$ ,  $HR_{TD}$ , and  $P_{ET}CO_{2TD}$  dropped from the  
307 model. Only  $MCAv_{BL}$  and  $MAP_{TD}$  were significant contributors, with  $HR_{BL}$  and  $P_{ET}CO_{2BL}$   
308 contributing non-significantly. Of the significant contributing factors, a higher  $MCAv$  at baseline  
309 ( $MCAv_{BL}$ ) and the longer  $MAP_{TD}$  was to the exponential increase after initiation of exercise, the  
310 longer the exponential increase in  $MCAv_{TD}$ .  $HR_{BL}$ ,  $P_{ET}CO_{2BL}$ ,  $MCAv_{BL}$ , and  $MAP_{TD}$  accounted for  
311 27% of the adjusted shared variation.

312 Within females,  $MAP_{BL}$ ,  $MCAv_{BL}$ , and  $P_{ET}CO_{2TD}$  dropped from the model.  $HR_{TD}$  and  
313  $MAP_{TD}$  significantly contributed to  $MCAv_{TD}$ , such that the longer  $HR_{TD}$  and  $MAP_{TD}$  were to their  
314 exponential increase after initiation of exercise, the longer the exponential increase in  $MCAv_{TD}$ .  
315 Exercise intensity,  $HR_{BL}$ ,  $P_{ET}CO_{2BL}$ ,  $HR_{TD}$ , and  $MAP_{TD}$  accounted for 37% of the adjusted shared  
316 variation.

317

318

319

320

321

322

323

324

325

326

327 **Table 6.** Regression results for time delay (TD)

| Independent Variables                 | Dependent Variable: MCAv <sub>TD</sub> |                               |                                       |
|---------------------------------------|----------------------------------------|-------------------------------|---------------------------------------|
|                                       | Total                                  | Males                         | Females                               |
| <b>Low Mod1</b>                       | Reference<br>2.77<br>[-11.13 – 16.67]  | -                             | Reference<br>4.41<br>[-17.29 – 26.12] |
| <b>Mod2</b>                           | -11.86<br>[-26.66 – 2.93]              | -                             | -20.55<br>[-45.80 – 4.71]             |
| <b>HR<sub>BL</sub></b>                | -                                      | 0.49<br>[-0.29 – 1.26]        | -1.08<br>[-2.34 – 0.18]               |
| <b>MAP<sub>BL</sub></b>               | -                                      | -                             | -                                     |
| <b>P<sub>ET</sub>CO<sub>2BL</sub></b> | -                                      | 2.03<br>[-0.25 – 4.31]        | -2.95<br>[-6.07 – 0.18]               |
| <b>MCAv<sub>BL</sub></b>              | -                                      | <b>0.98*</b><br>[0.10 – 1.86] | -                                     |
| <b>HR<sub>TD</sub></b>                | <b>0.91*</b><br>[0.10 – 1.72]          | -                             | <b>1.15*</b><br>[0.07 – 2.23]         |
| <b>MAP<sub>TD</sub></b>               | <b>0.43**</b><br>[0.13 – 0.74]         | <b>0.54*</b><br>[0.13 – 0.94] | <b>0.57*</b><br>[0.08 – 1.05]         |
| <b>P<sub>ET</sub>CO<sub>2TD</sub></b> | -                                      | -                             | -                                     |
| <b>Intercept</b>                      | <b>42.52***</b><br>[26.29 – 58.75]     | -146.03<br>[-298.24 – 6.19]   | <b>235.30*</b><br>[64.15 – 406.45]    |
| <b>R-squared</b>                      | 0.24                                   | 0.38                          | 0.54                                  |
| <b>Adjusted R-squared</b>             | 0.17                                   | 0.27                          | 0.37                                  |
| <b>Residual Std. Error</b>            | 19.05                                  | 16.27                         | 18.18                                 |
| <b>F Statistic</b>                    | <b>3.52*</b><br>df = 4,44              | <b>3.28*</b><br>df = 4,21     | <b>3.13*</b><br>df = 6,16             |

328 For each variable, the primary number is the  $\beta$ -weight or standardized regression coefficient. A  
 329 dash (-) indicates that the variable was dropped during the backward AIC model selection. 95%  
 330 confidence intervals are reported in brackets. <sub>BL</sub>, baseline. HR, heart rate. MAP, mean arterial  
 331 pressure. MCAv, middle cerebral artery blood velocity. P<sub>ET</sub>CO<sub>2</sub>, end-tidal CO<sub>2</sub>. <sub>TD</sub>, time delay. \*,  
 332 p-value < 0.05. \*\*, p-value < 0.01. \*\*\*, p-value < 0.001.

333



334 For MCAV<sub>T</sub>, only  $_{TD}$  dynamic factors were included in the model because HR<sub>T</sub>, MAP<sub>T</sub>,  
335 and P<sub>ET</sub>CO<sub>2T</sub> all occurred after MCAV<sub>T</sub> (Table 7). Exercise intensity and MAP<sub>TD</sub> dropped from the  
336 model. HR<sub>TD</sub> remained in the model, but its contribution was not significant. P<sub>ET</sub>CO<sub>2TD</sub> and  
337 MCAV<sub>TD</sub> significantly contributed to MCAV<sub>T</sub>, such that the longer P<sub>ET</sub>CO<sub>2TD</sub> was to the  
338 exponential increase after initiation of exercise, the longer the time to 63-of-peak (MCAV<sub>T</sub>).  
339 Additionally, the longer MCAV<sub>TD</sub> was to the exponential increase after the initiation of exercise,  
340 the less time to MCAV<sub>T</sub>. HR<sub>TD</sub>, P<sub>ET</sub>CO<sub>2TD</sub>, and MCAV<sub>TD</sub> accounted for 21% of the adjusted shared  
341 variation.

342 For males, exercise intensity, P<sub>ET</sub>CO<sub>2TD</sub>, and MCAV<sub>TD</sub> dropped from the model. HR<sub>TD</sub>  
343 remained in the model, but its contribution was not significant. MAP<sub>TD</sub> significantly contributed to  
344 MCAV<sub>T</sub>, such that the longer MAP<sub>TD</sub> was to the exponential increase after initiation of exercise,  
345 the less time to MCAV<sub>T</sub>. HR<sub>TD</sub> and MAP<sub>TD</sub> accounted for 48% of the adjusted shared variation.

346 For females, exercise intensity and P<sub>ET</sub>CO<sub>2TD</sub> dropped from the model. HR<sub>TD</sub> remained in  
347 the model, but its contribution was not significant. MAP<sub>TD</sub> significantly contributed to MCAV<sub>T</sub>,  
348 such that the longer MAP<sub>TD</sub> was to the exponential increase after initiation of exercise, the  
349 longer the time to MCAV<sub>T</sub>. Additionally, the longer MCAV<sub>TD</sub> was to the exponential increase after  
350 the initiation of exercise, the less time to MCAV<sub>T</sub>. HR<sub>TD</sub>, P<sub>ET</sub>CO<sub>2TD</sub>, and MCAV<sub>TD</sub> accounted for  
351 21% of the adjusted shared variation. HR<sub>TD</sub>, MAP<sub>TD</sub>, and MCAV<sub>TD</sub> accounted for 61% of the  
352 adjusted shared variation.

353

354

355

356

357

358

359

360 **Table 7. Regression results for tau ( $\tau$ )**

| Independent Variables                 | Dependent Variable: $MCAv_{\tau}$ |                                     |                                   |
|---------------------------------------|-----------------------------------|-------------------------------------|-----------------------------------|
|                                       | Total                             | Males                               | Females                           |
| <b>Low</b>                            | -                                 | -                                   | -                                 |
| <b>Mod1</b>                           | -                                 | -                                   | -                                 |
| <b>Mod2</b>                           | -                                 | -                                   | -                                 |
| <b>HR<sub>TD</sub></b>                | -0.64<br>[-1.47 - 0.19]           | -0.87<br>[-1.84 - 0.11]             | -0.69<br>[-1.63 - 0.25]           |
| <b>MAP<sub>TD</sub></b>               | -                                 | <b>-0.76***</b><br>[-1.07 to -0.44] | <b>1.06***</b><br>[0.64 - 1.48]   |
| <b>P<sub>ET</sub>CO<sub>2TD</sub></b> | <b>0.29*</b><br>[0.06 - 0.53]     | -                                   | -                                 |
| <b>MCAv<sub>TD</sub></b>              | <b>-0.31*</b><br>[-0.61 to -0.02] | -                                   | <b>-0.46*</b><br>[-0.84 to -0.08] |
| <b>Intercept</b>                      | <b>29.92**</b><br>[10.06 - 49.78] | <b>45.79***</b><br>[30.73 - 60.86]  | 7.05<br>[-18.61 - 32.72]          |
| <b>R-squared</b>                      | 0.26                              | 0.52                                | 0.66                              |
| <b>Adjusted R-squared</b>             | 0.21                              | 0.48                                | 0.61                              |
| <b>Residual Std. Error</b>            | 20.95                             | 13.70                               | 17.74                             |
| <b>F Statistic</b>                    | <b>5.18**</b><br>df = 3,45        | <b>12.37***</b><br>df = 2,23        | <b>12.29***</b><br>df = 3,19      |

361 For each variable, the primary number is the  $\beta$ -weight or standardized regression coefficient. A  
 362 dash (-) indicates that the variable was dropped during the backward AIC model selection. 95%  
 363 confidence intervals are reported in brackets. HR, heart rate. MAP, mean arterial pressure.  
 364 MCAv, middle cerebral artery blood velocity. P<sub>ET</sub>CO<sub>2</sub>, end-tidal CO<sub>2</sub>.  $\tau$ , tau. TD, time delay. \*, p-  
 365 value < 0.05. \*\*, p-value < 0.01. \*\*\*, p-value < 0.001.

366  
 367 For MCAv<sub>SS</sub>, exercise intensity, all  $\tau$  dynamic factors (except MCAv <sub>$\tau$</sub> ), and HR<sub>SS</sub> dropped  
 368 from the model. All remaining dynamic factors significantly contributed to MCAv<sub>SS</sub>. The longer  
 369 the time to 63-of-peak (MCAv <sub>$\tau$</sub> ), the greater the absolute change in MAP<sub>SS</sub> and PETCO<sub>2SS</sub>; the  
 370 larger the absolute change in MCAv<sub>SS</sub>. MCAv <sub>$\tau$</sub> , MAP<sub>SS</sub>, and PETCO<sub>2SS</sub> accounted for 60% of the  
 371 adjusted shared variation.

372 For males, exercise intensity, all  $\tau$  dynamic factors, and  $HR_{SS}$  dropped from the model.  
373 All remaining dynamic factors significantly contributed to  $MCAv_{SS}$ , such that the greater the  
374 absolute change in  $MAP_{SS}$  and  $P_{ET}CO_{2SS}$ , the larger the absolute change in  $MCAv_{SS}$ .  $MAP_{SS}$  and  
375  $P_{ET}CO_{2SS}$  accounted for 43% of the adjusted shared variation.

376 For females,  $HR_T$ ,  $MAP_T$ , and  $HR_{SS}$  dropped from the model. Exercise intensity and  
377  $P_{ET}CO_{2SS}$  remained in the model but did not significantly contribute. Like the total sample,  
378  $MCAv_T$ ,  $MAP_{SS}$ , and  $P_{ET}CO_{2SS}$  were all significant contributors. Thus, the longer the time to 63-  
379 of-peak ( $MCAv_T$ ), the greater the absolute change in  $MAP_{SS}$  and  $P_{ET}CO_{2SS}$ ; the larger the  
380 absolute change in  $MCAv_{SS}$ .  $MCAv_T$ ,  $MAP_{SS}$ , and  $P_{ET}CO_{2SS}$  accounted for 78% of the adjusted  
381 shared variation.

382  
383  
384  
385  
386  
387  
388  
389  
390  
391  
392  
393  
394  
395  
396  
397

398 **Table 8.** Regression results for steady-state ( $_{ss}$ )

| Independent Variables      | Dependent Variable: $MCAv_{ss}$    |                                |                                 |
|----------------------------|------------------------------------|--------------------------------|---------------------------------|
|                            | Total                              | Males                          | Females                         |
| Low                        | -                                  | -                              | Reference                       |
| Mod1                       | -                                  | -                              | -0.81<br>[-3.85 – 2.23]         |
| Mod2                       | -                                  | -                              | -3.44<br>[-7.52 – 2.23]         |
| $HR_T$                     | -                                  | -                              | -                               |
| $MAP_T$                    | -                                  | -                              | -                               |
| $P_{ET}CO_{2T}$            | -                                  | -                              | -0.04<br>[-0.08 – 0.01]         |
| $MCAv_T$                   | <b>0.10*</b><br>[0.02 – 0.17]      | -                              | <b>0.10***</b><br>[0.06 – 0.14] |
| $HR_{ss}$                  | -                                  | -                              | -                               |
| $MAP_{ss}$                 | <b>0.53***</b><br>[0.35 – 0.71]    | <b>0.56**</b><br>[0.21 – 0.90] | <b>0.49***</b><br>[0.28 – 0.69] |
| $P_{ET}CO_{2ss}$           | <b>1.07***</b><br>[0.65 – 1.49]    | <b>1.18**</b><br>[0.46 – 1.90] | <b>0.75***</b><br>[0.36 – 1.14] |
| Intercept                  | <b>-7.09*</b><br>[-13.12 to -1.06] | -5.35<br>[-18.05 – 7.35]       | -1.91<br>[-6.60 – 2.78]         |
| <b>R-squared</b>           | 0.62                               | 0.48                           | 0.84                            |
| <b>Adjusted R-squared</b>  | 0.60                               | 0.43                           | 0.78                            |
| <b>Residual Std. Error</b> | 6.16                               | 8.35                           | 2.43                            |
| <b>F Statistic</b>         | <b>24.86***</b><br>df = 3,45       | <b>10.52***</b><br>df = 2,23   | <b>14.28***</b><br>df = 6,16    |

399 For each variable, the primary number is the  $\beta$ -weight or standardized regression coefficient. A  
 400 dash (-) indicates that the variable was dropped during the backward AIC model selection. 95%  
 401 confidence intervals are reported in brackets. HR, heart rate. MAP, mean arterial pressure.  
 402  $MCAv$ , middle cerebral artery blood velocity.  $P_{ET}CO_2$ , end-tidal  $CO_2$ .  $\tau$ , tau.  $_{ss}$ , steady-state. \*, p-  
 403 value < 0.05. \*\*, p-value < 0.01. \*\*\*, p-value < 0.001.

404  
 405 **Fig 1. Average dynamic response during each exercise bout.** Mean dynamic heart rate  
 406 (HR), mean arterial pressure (MAP), middle cerebral artery blood velocity ( $MCAv$ ), and end-tidal

407 CO<sub>2</sub> (P<sub>ET</sub>CO<sub>2</sub>) responses during Low (A), Mod1 (B), and Mod2 (C). Timepoint zero indicates the  
408 onset of exercise. The gray shaded areas around the lines are the 95% confidence intervals.  
409 The gray box between the 180 to 270 s indicates steady-state.

410

## 411 Discussion

412 This investigation suggests that HR, MAP, and P<sub>ET</sub>CO<sub>2</sub> contribution varies throughout  
413 the MCAv dynamic response pathways during aerobic exercise, and contribution differs within  
414 males and females. Time to the exponential increase in HR and MAP are significant contributing  
415 factors during the initial response to exercise, but 83% of the variation is still unexplained.  
416 Continuing into the  $\tau$  phase, MAP is no longer a contributor, but the time to the exponential  
417 increase in P<sub>ET</sub>CO<sub>2</sub> and MCAv is, but 79% of the variation is still unexplained. It is not until the  
418 steady-state phase that the MCAv time-to-63% of peak ( $\tau$ ) and the absolute changes in MAP  
419 and P<sub>ET</sub>CO<sub>2</sub> contribute most to MCAv<sub>SS</sub> phase, explaining 60% of the variation. This evidence  
420 suggests that at the initiation of exercise, other factors beyond these central physiological  
421 components play significant roles across the dynamic pathway that explain the dynamic  
422 response of MCAv.

423 Cardiac regulation, directly and indirectly, affects cerebral vasculature [17-19]. Previous  
424 research has reported that changes in cardiac output influence cerebral blood velocity during  
425 exercise in healthy young adults [19]. At the onset of dynamic exercise, oxygen consumption  
426 increases and continues to increase over the first minute of steady-state exercise and then  
427 plateaus as the oxygen uptake and transport match the demand of the tissues. The increase in  
428 cardiac output is due to an initial increase in stroke volume and heart rate, with both variables  
429 plateauing within two minutes of steady-state exercise. Concerning our findings, cardiac output,  
430 specifically stroke volume, may significantly contribute to MCAv during exercise initiation [13].  
431 Once cardiac output plateaus in the steady-state phase of the exercise, its contribution may

432 lessen, and other factors such as MAP and  $P_{ET}CO_{2TD}$  may contribute more, as seen in our  
433 findings of 60% for  $MCAv_{SS}$ .

434 Our findings suggest that sexes may differ in central hemodynamic adjustments and  
435 adaptations to dynamic exercise [20]. Regarding the sex-related difference in hemodynamic  
436 response during exercise, it has been found that males have higher systolic blood pressure  
437 during exercise than females, probably due to females' blunted sympathetic response and  
438 higher vasodilatory state of females [21]. One potentially confounding factor is the fluctuation in  
439 estrogens throughout the menstrual cycle, which can impact blood volume, systemic vascular  
440 resistance, and ventricular functions [22]. As all the females were in the early follicular phase  
441 (Days 1-7), we do not believe hormonal factors played a significant role in the variability within  
442 females, but it is unclear if this resulted in differences between sexes. The potential role played  
443 by autonomic activity and hormone fluctuations should be investigated. Furthermore, the  
444 potential gender-related hemodynamic difference is the lower maximum level of stroke volume  
445 reached during dynamic exercise by women compared to men. The smaller cardiac size due to  
446 smaller body may be responsible for the reduced stroke volume and cardiac output often  
447 reported in females [23, 24]. Central command has been almost completely overlooked by  
448 scientists within the cerebrovascular function field, and such considerations of their effects on  
449  $MCAv$  should be included in future exercise investigations and may explain some of the variation.

450 Aerobic exercise is commonly used to stress the cardiovascular system, which allows for  
451 the quantification and evaluation of cardiovascular disease severity. However, this modeling  
452 technique could assess cerebrovascular function and disease during aerobic exercise. Declines  
453 in cerebral blood velocity are often observed with advancing age and disease. The decline in  
454 cerebral blood velocity may be observed at rest but is often enhanced in response to various  
455 challenges. They are thought to reflect a deterioration in cerebrovascular reserve, or "the ability  
456 of cerebral blood vessels to respond to increased metabolic demand and chemical, mechanical,  
457 or neural stimuli." [25] Understanding the dynamic response of associated physiological

458 variables within young adults will allow us to understand responses within aging populations.  
459 Because aging and pathology may affect the hemodynamic and CO<sub>2</sub> reactions to exercise, this  
460 may also be reflected in the association with the MCAv response. Furthermore, we will be able  
461 to investigate how exercise interventions affect the dynamic response of hemodynamics and  
462 P<sub>ET</sub>CO<sub>2</sub> and how their relationship to MCAv changes as a result of training.

463 We recognize limitations to the present investigation. Although TCD can directly  
464 measure cerebral blood velocity, it cannot measure the diameter of a vessel. The current  
465 evidence of whether exercise induces changes in MCA diameter is conflicting [26, 27]. Our  
466 methodology assumes a constant MCA diameter during the exercise transition. However, if the  
467 diameter does change, a change is likely to be very slight in larger basal arteries, such as the  
468 MCA, and it would not affect blood velocity to a great extent [28]. Within our protocol, we  
469 increase the watts systematically over the first 30-s of the exercise. Exercise intensity was a  
470 non-significant factor at the initiation of exercise, and it may be explained by how we set watts.  
471 Despite this finding, we believe this methodology is essential and should be implemented to  
472 reduce the participant from eliciting a Valsalva maneuver and altering the hemodynamic  
473 responses at the initiation of exercise. Lastly, the sample was small, especially within sex  
474 groups, and limited to young, healthy adults, and future study comparisons should consider this.

475 These findings provide characterization and novel insight into central hemodynamics  
476 and PETCO<sub>2</sub>'s contribution to MCAv dynamics during aerobic exercise. Heart rate, mean  
477 arterial pressure and end-tidal CO<sub>2</sub> partial pressure contribute little at the initiation of exercise  
478 but mean arterial pressure and end-tidal CO<sub>2</sub> partial pressure contribute to most of the MCAv  
479 response during steady-state exercise. Further work is necessary to support these findings by  
480 investigating other factors, such as cardiac output and sex differences, that help explain the  
481 variation in the MCAv response. Furthermore, as we have characterized the contribution of  
482 hemodynamics and end-tidal CO<sub>2</sub> partial pressure to MCAv dynamics, an investigation into  
483 exercise intervention effects on dynamics is underway.

484

## 485 **Acknowledgments**

486 None

487

488

489

490

491

492

493

494

495

496

497

498

499

500

501

502

503

504

505

506

507

508

509

510

511

512

513

514

515



516  
517  
518  
519  
520  
521  
522  
523  
524  
525  
526  
527  
528  
529  
530  
531  
532  
533  
534  
535  
536  
537  
538  
539  
540  
541  
542  
543  
544  
545  
546  
547  
548  
549  
550  
551  
552  
553  
554  
555  
556  
557  
558  
559  
560  
561

## References

1. Tomoto T, Liu J, Tseng BY, Pasha EP, Cardim D, Tarumi T, et al. One-Year Aerobic Exercise Reduced Carotid Arterial Stiffness and Increased Cerebral Blood Flow in Amnesic Mild Cognitive Impairment. *J Alzheimers Dis.* 2021;80(2):841-53.
2. Akazawa N, Tanahashi K, Kosaki K, Ra SG, Matsubara T, Choi Y, et al. Aerobic exercise training enhances cerebrovascular pulsatility response to acute aerobic exercise in older adults. *Physiol Rep.* 2018;6(8):e13681.
3. Billinger SA, Craig JC, Kwapiszeski SJ, Sisante J-FV, Vidoni ED, Maletsky R, et al. Dynamics of middle cerebral artery blood flow velocity during moderate intensity exercise. *J Appl Physiol.* 2017;122(5):1125-33.
4. Purkayastha S, Sorond F. Transcranial Doppler ultrasound: technique and application. *Semin Neurol.* 2012;32(4):411-20.
5. Witte E, Liu Y, Ward JL, Kempf KS, Whitaker A, Vidoni ED, et al. Exercise intensity and middle cerebral artery dynamics in humans. *Respir Physiol Neurobiol.* 2019;262:32-9.
6. Ward JL, Craig JC, Liu Y, Vidoni ED, Maletsky R, Poole DC, et al. Effect of healthy aging and sex on middle cerebral artery blood velocity dynamics during moderate-intensity exercise. *Am J Physiol Heart Circ Physiol.* 2018;315(3):H492-h501.
7. Alwatban MR, Liu Y, Perdomo SJ, Ward JL, Vidoni ED, Burns JM, et al. TCD Cerebral Hemodynamic Changes during Moderate-Intensity Exercise in Older Adults. *J Neuroimaging.* 2020;30(1):76-81.
8. Kempf KS, Whitaker AA, Lui Y, Witte E, Perdomo SJ, Ward JL, et al. The Effect of Stroke on Middle Cerebral Artery Blood Flow Velocity Dynamics During Exercise. *J Neurol Phys Ther.* 2019;43(4):212-9.
9. Billinger SA, Whitaker AA, Morton A, Kaufman CS, Perdomo SJ, Ward JL, et al. Pilot Study to Characterize Middle Cerebral Artery Dynamic Response to an Acute Bout of Moderate Intensity Exercise at 3- and 6-Months Poststroke. *J Am Heart Assoc.* 2021;10(3):e017821.
10. Fisher JP, Young CN, Fadel PJ. Central sympathetic overactivity: maladies and mechanisms. *Auton Neurosci.* 2009;148(1-2):5-15.
11. Addicott MA, Yang LL, Peiffer AM, Burnett LR, Burdette JH, Chen MY, et al. The effect of daily caffeine use on cerebral blood flow: How much caffeine can we tolerate? *Hum Brain Mapp.* 2009;30(10):3102-14.
12. Medicine. ACoS. ACSM's guidelines for exercise testing and prescription. 10th ed. Philadelphia, PA: Lippincott Williams & Wilkins; 2018.
13. Smith KJ, Ainslie PN. Regulation of cerebral blood flow and metabolism during exercise. *Exp Physiol.* 2017;102(11):1356-71.
14. Moraine JJ, Lamotte M, Berré J, Niset G, Leduc A, Naeije R. Relationship of middle cerebral artery blood flow velocity to intensity during dynamic exercise in normal subjects. *Eur J Appl Physiol Occup Physiol.* 1993;67(1):35-8.
15. Borg GA. Perceived exertion. *Exerc Sport Sci Rev.* 1974;2:131-53.
16. Baty F, Ritz C, Charles S, Brutsche M, Flandrois J-P, Delignette-Muller M-L. A Toolbox for Nonlinear Regression in R: The Package nlstools. *Journal of Statistical Software.* 2015;66(5).
17. Ogoh S, Ainslie PN. Cerebral blood flow during exercise: mechanisms of regulation. *J Appl Physiol (1985).* 2009;107(5):1370-80.
18. Ogoh S, Ainslie PN. Regulatory mechanisms of cerebral blood flow during exercise: new concepts. *Exerc Sport Sci Rev.* 2009;37(3):123-9.

- 562 19. Ogoh S, Brothers RM, Barnes Q, Eubank WL, Hawkins MN, Purkayastha S, et al. The effect of  
563 changes in cardiac output on middle cerebral artery mean blood velocity at rest and during exercise. *J*  
564 *Physiol.* 2005;569(Pt 2):697-704.
- 565 20. Bassareo PP, Crisafulli A. Gender Differences in Hemodynamic Regulation and Cardiovascular  
566 Adaptations to Dynamic Exercise. *Curr Cardiol Rev.* 2020;16(1):65-72.
- 567 21. Wheatley CM, Snyder EM, Johnson BD, Olson TP. Sex differences in cardiovascular function  
568 during submaximal exercise in humans. *Springerplus.* 2014;3:445.
- 569 22. Green DJ, Hopkins ND, Jones H, Thijssen DH, Eijssvogels TM, Yeap BB. Sex differences in vascular  
570 endothelial function and health in humans: impacts of exercise. *Exp Physiol.* 2016;101(2):230-42.
- 571 23. Gardin JM, Savage DD, Ware JH, Henry WL. Effect of age, sex, and body surface area on  
572 echocardiographic left ventricular wall mass in normal subjects. *Hypertension.* 1987;9(2 Pt 2):li36-9.
- 573 24. Hutchinson PL, Cureton KJ, Outz H, Wilson G. Relationship of cardiac size to maximal oxygen  
574 uptake and body size in men and women. *Int J Sports Med.* 1991;12(4):369-73.
- 575 25. Davenport MH, Hogan DB, Eskes GA, Longman RS, Poulin MJ. Cerebrovascular reserve: the link  
576 between fitness and cognitive function? *Exerc Sport Sci Rev.* 2012;40(3):153-8.
- 577 26. Brothers RM, Zhang R. CrossTalk opposing view: The middle cerebral artery diameter does not  
578 change during alterations in arterial blood gases and blood pressure. *J Physiol.* 2016;594(15):4077-9.
- 579 27. Hoiland RL, Ainslie PN. CrossTalk proposal: The middle cerebral artery diameter does change  
580 during alterations in arterial blood gases and blood pressure. *J Physiol.* 2016;594(15):4073-5.
- 581 28. Giller CA, Bowman G, Dyer H, Mootz L, Krippner W. Cerebral arterial diameters during changes  
582 in blood pressure and carbon dioxide during craniotomy. *Neurosurgery.* 1993;32(5):737-41; discussion  
583 41-2.

584

585

586

587

588

589

590

591

592

593

594

595

596

597

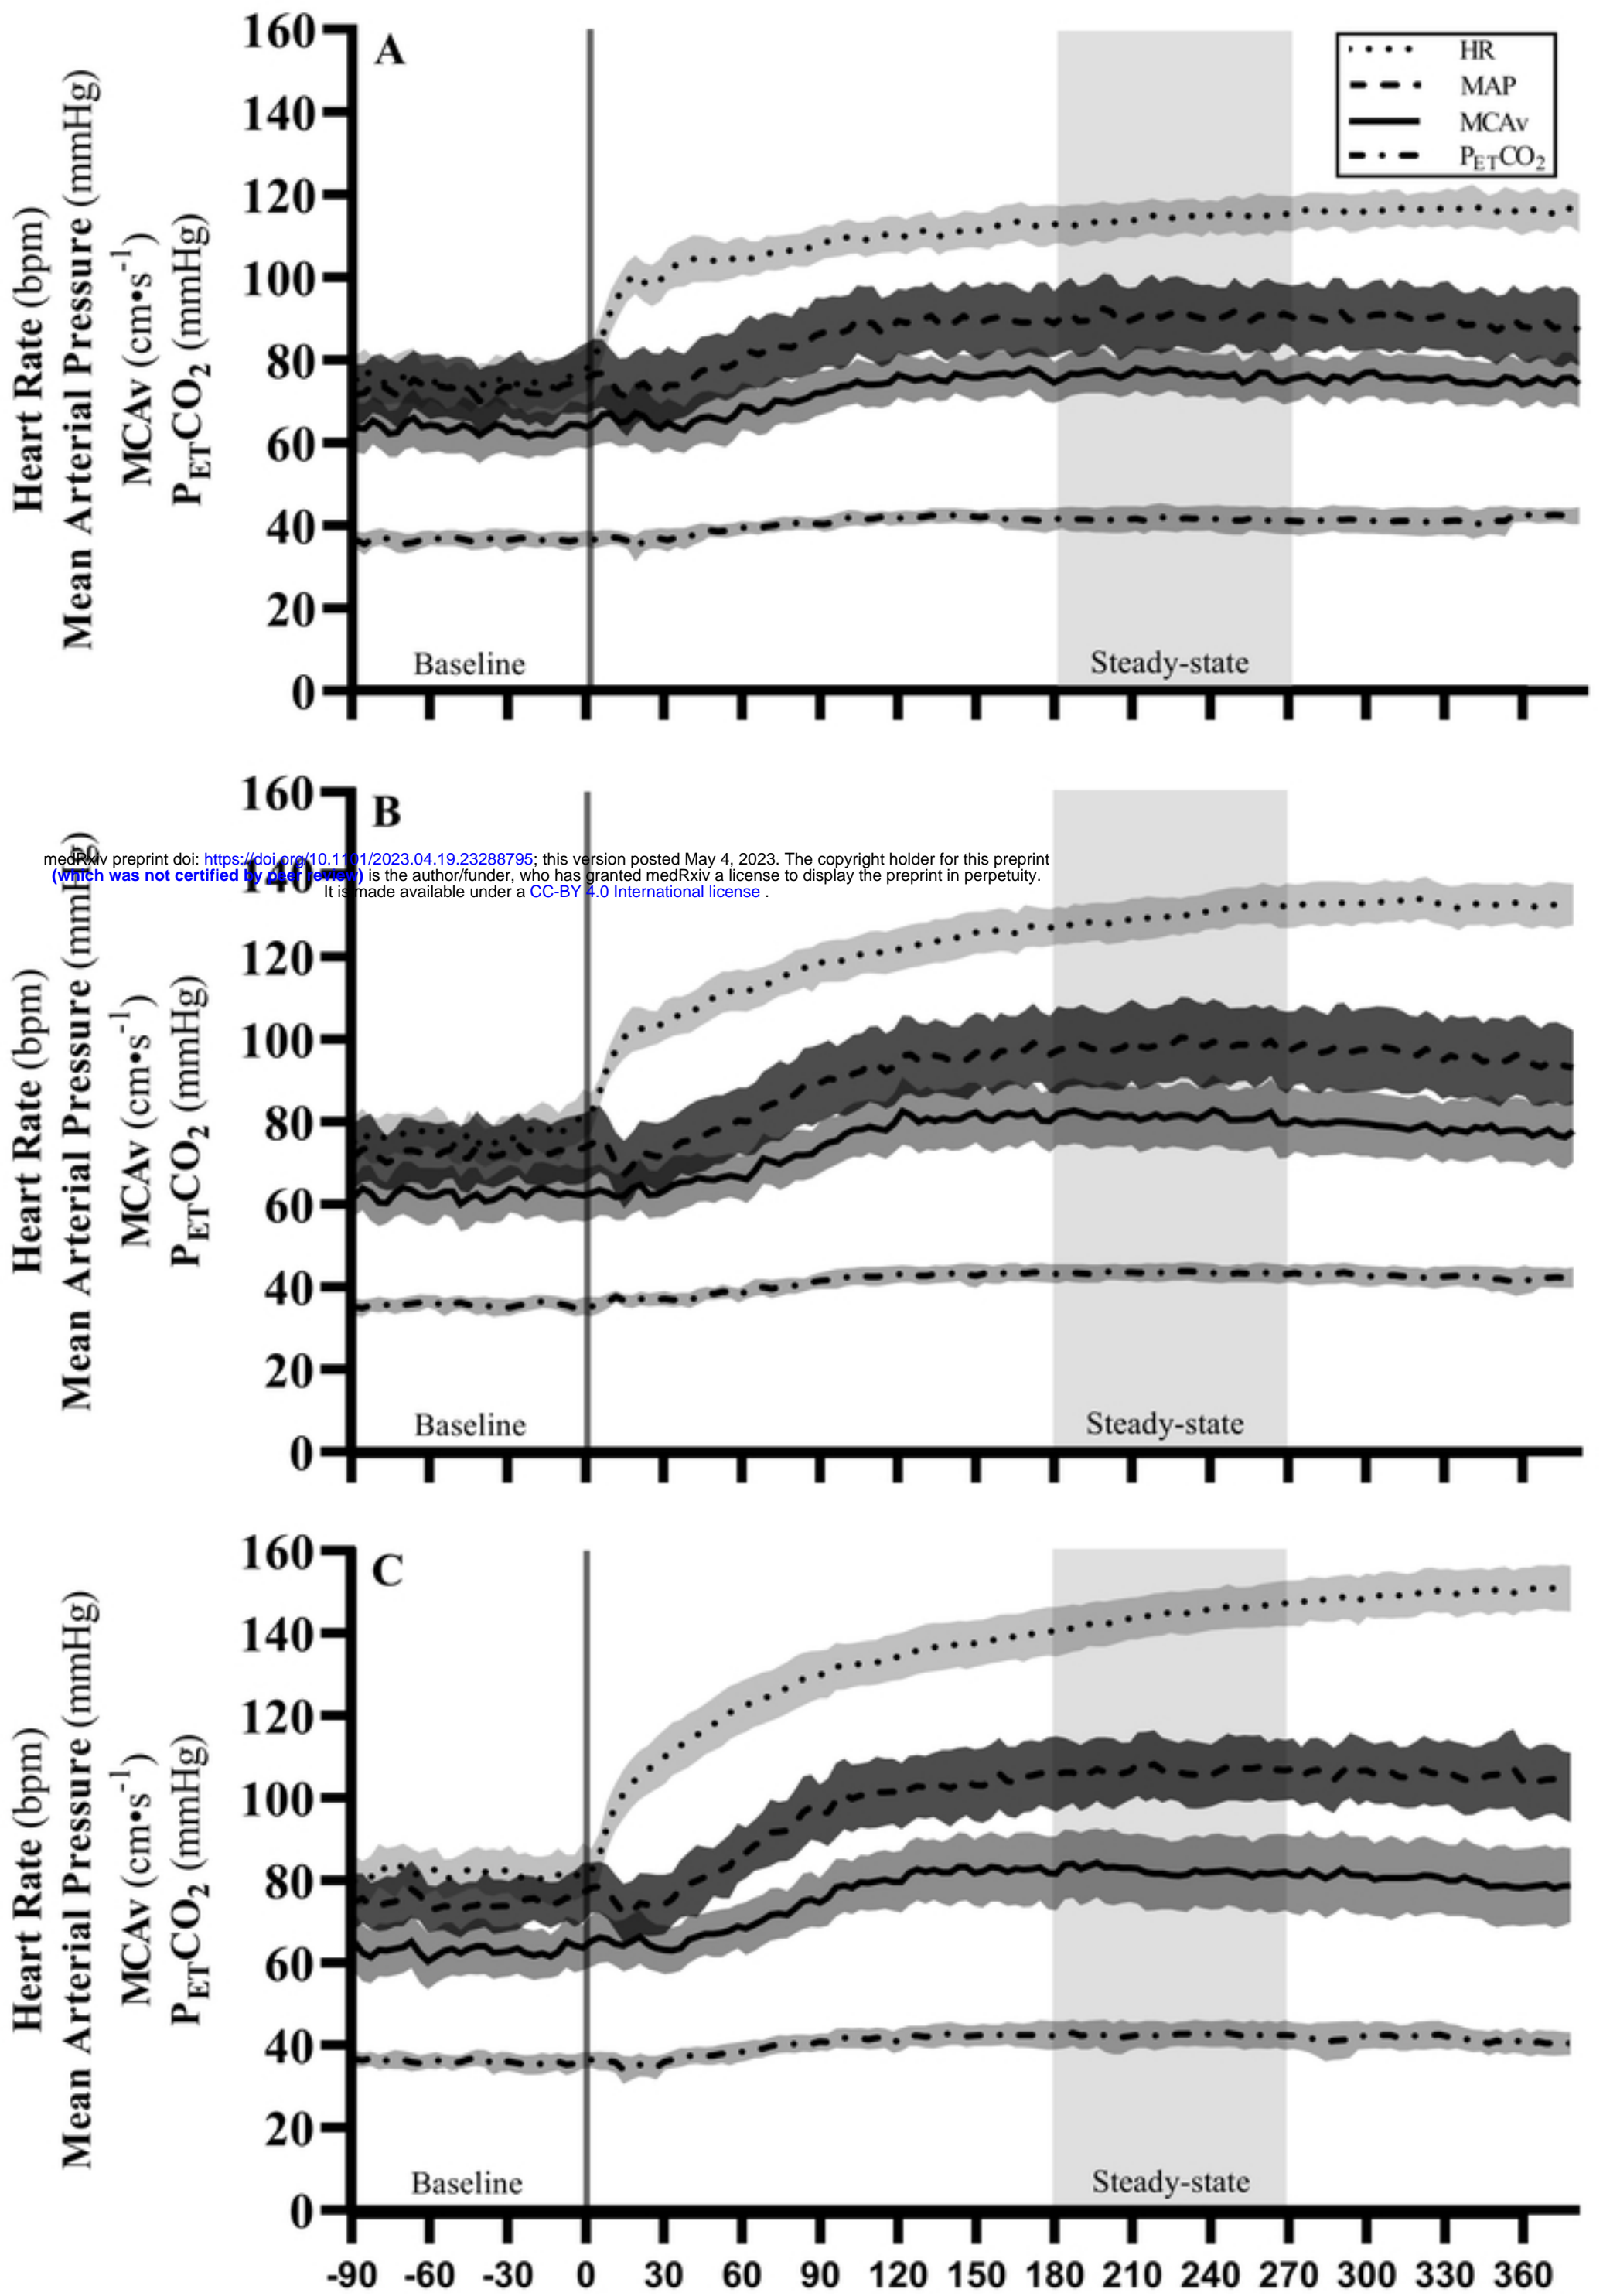

Fig 1
